# Supplementary material for: Tracking Cats: Problems with Placing Feline Carnivores on δ18O, δD Isoscapes
Source: PLoS One. 2011 Sep 9;6(9):e24601. doi: 10.1371/journal.pone.0024601 (PMC3170367; doi:10.1371/journal.pone.0024601)
Supplement: Table S1 — Sample list. (XLS) [file pone.0024601.s001.xls]

## Sheet: Tabelle1
Table S1. Sample list
No.	Museum catalog number	Sampling part	Common name	Genus	Species	Subspecies	Sex	Museum (Smithsonian or Utah )	Collection date	Country	State	County	Precise Location	Latitude (decimal degrees)	Longitude (decimal degrees)	Elevation (m)	δD (‰ V-SMOW) Mean annual precipitation	δ18O (‰ V-SMOW) Mean annual precipitation	Rivername after Coplen and Kendall (2000)	δ18O Riverwater after Coplen and Kendall (2000)	δD Riverwater after Coplen and Kendall (2000)	River drainage area (km2)	δD Keratin (‰ V-SMOW)	δ18O Keratin (‰ V-SMOW)	δD (‰ V-SMOW) Mean Summer precipitation (June, July, August)	δ18O (‰ V-SMOW) Mean Summer precipitation (June, July, August)	Mean annual rel. humidity (%)	δD (‰ V-SMOW) Mean spring precipitation (March, April, May)	δ18O (‰ V-SMOW) Mean spring precipitation (March, April, May)
1	232789	hair	bobcat	Lynx	rufus	floridanus	unknown	S	1919-08-01	United States	Florida		Chokoloskee	25.826	-81.344	3	-21	-3.5	Fisheating Creek At Palmdale	-0.1	0.55	805.49	-112.22	16.41	-22.3333	-3.5	70	-13	-2.7
2	157063	hair	bobcat	Lynx	rufus	rufus	male	S	1908-07-15	United States	Georgia		Brasstown Bald	34.869	-83.814	1460	-53	-8.1	Cataloochee Creek Near Cataloochee	-7.4	-45.6	127.428	-87.37	19.2	-29	-4.7	70	-47.3333	-7.33333
3	276020	hair	bobcat	Lynx	rufus	rufus	unknown	S	1948-01-05	United States	West Virginia		Beaverdam Run	38.902	-81.31	243	-48	-7.5	Little Kanawha River At Palestine, WV	-7.3	-47.6	3923.85	-87.37	19.4	-28.3333	-4.6	70	-42.3333	-6.8
4	298442	hair	bobcat	Lynx	rufus	rufus	unknown	S	1954-11-05	United States	New York	Hamilton County	Adirondack Mountains	43.998	-74.505	940	-80	-11.9	Oswegatchie River Near Heuvelton	-9.9	-96.1	2499.35	-106.85	16.89	-51	-8.03333	65	-77.6667	-11.4
5	88448	hair	bobcat	Lynx	rufus	gigas	male	S	Mar 1897	Canada	Nova Scotia		Digby	44.628	-65.776	150	-68	-10.2	St. Croix River At Milltown, Maine	-8	-57	3781.4	-94.57	21.7	-45	-7.03333	80	-63	-9.46667
6	210545	hair	bobcat	Lynx	rufus	floridanus	female	S	7 Jan 1916	United States	Alabama		Orange Beach	30.27	-87.683	4	-26	-4.1	Perdido River At Barrineau Park	-3.9	-20.3	1020.46	-97.57	19.62	-20.6667	-3.1	80	-18	-3.1
7	286410	hair	bobcat	Lynx	rufus	rufus	male	S	15 Jan 1951	United States	Tennessee	Henry County	Bennetts Creek. Tennessee National Wildlife Refuge	36.365	-88.045	120	-39	-6.1	Buffalo River Near Flat Woods	-5.7	-33.1	1157.73	-87.19	13.6	-18.6667	-3.03333	70	-30	-5
8	236419	hair	bobcat	Lynx	rufus	rufus	female	S	2 Apr 1921	United States	Arkansas		Fallsville	35.7768	-93465	670	-49	-7.1	North Sylamore Creek Near Fifty Six	-5.8	-34.5	150.22	-85.82	16.96	-28.6667	-4.26667	65	-43.3333	-6.36667
9	76459	hair	bobcat	Lynx	rufus	rufus	unknown	S	Dec 1895	United States	Nebraska		Johnstown	42.571	-100.062	800	-77	-10.6	Niobrara River Near Verdel	-10.1	-75.1	32634	-65.9	19.36	-60.3333	-8.26667	60	-85	-11.8
10	285332	hair	bobcat	Lynx	rufus	superiorensis	male	S	26 Jan 1944	United States	Minnesota		Whitman. Near	44.159	-91.816	213	-64	-9.1	North Fork Whitewater River Near Elba	-9.8	-67.9	261.59	-100.21	14.7	-44.6667	-6.33333	70	-66.3333	-9.53333
11	276360	hair	bobcat	Lynx	rufus	rufus	male	S	1949	United States	South Dakota		Pierre	44.3723	-100.318	440	-79	-10.7	Missouri River At Pierre	-14.2	-115.5	630665	-107.99	16.43	-62	-8.4	60	-87.3333	-12.0333
12	211368	hair	bobcat	Lynx	rufus	pallescens	female	S	29 Jan 1916	United States	Montana	Granite County	Phillipsburg	46.336	-113.294	1600	-115	-15.2	Clark Fork Below Missoula	-17.3	-131.6	23317.8	-100.92	12.52	-88.3333	-11.5	70	-114.667	-15.3333
13	214795	hair	bobcat	Lynx	rufus	pallescens	female	S	8 Apr 1916	United States	Colorado	Routt County	Battle Creek	41.001	-107.246	2100	-106	-14.2	Yampa River Near Maybell	-16.4	-123.9	8831.9	-89.26	13.88	-81	-10.5667	60	-109	-14.7
14	1709	hair	bobcat	Lynx	rufus	baileyi	female	S	13 Nov 1885	United States	New Mexico		Dona Ana	32.4832	-106.724	1200	-67	-9.3	Rio Grande Conveyance Channel At San Marcial	-12.5	-94	0	-88.51	15.37	-57.6667	-7.8	40	-66.6667	-9.26667
15	211376	hair	bobcat	Lynx	rufus	pallescens	male	S	27 Jan 1916	United States	Idaho	Idaho County	White Bird	45.774	-116.302	480	-98	-12.9	Salmon River At Whitebird	-17.5	-132.7	35094.5	-81.09	11.16	-76.3333	-9.5	60	-90.6667	-12.1
16	274903	hair	bobcat	Lynx	rufus	fasciatus	female	S	18 Feb 1946	United States	Washington	Clallam County	Forks	47.956	-124.393	90	-86	-11.1	Elwha River At McDonald Br Near Prt Angeles	-12.6	-89.7	696.71	-86.76	16.75	-75.6667	-8.93333	85	-83	-10.7333
17	146256	hair	bobcat	Lynx	rufus	fasciatus	male	S	30 Oct 1905	United States	California	Humboldt County	Rio Dell	40.491	-124.132	50	-80	-10.4	Eel River At Scotia	-7.4	-50.4	8062.67	-95.6	11.58	-65	-7.3	70	-76.6667	-9.83333
18	214967	hair	bobcat	Lynx	rufus	texensis	female	S	12 Feb 1916	United States	Texas	Reagan County	Big Lake	31.197	-101.464	820	-50	-6.9	Pecos River At Red Bluff	-4.1	-20.5	50608.6	-57.76	10.37	-41.3333	-5.46667	55	-44.3333	-6.13333
19	116282	hair	bobcat	Lynx	rufus	texensis	male	S	-- Dec 1901	United States	Texas	Nueces County	Corpus Christi	27.826	-97.406	2	-27	-3.6	Nueces River Near Three Rivers	-2.8	-17.4	40404	-70.52	12.35	-24	-2.76667	80	-16.3333	-2.2
20	119799	hair	bobcat	Lynx	rufus	baileyi	unknown	S	-- Jul 1901	United States	Texas		Fort Davis	30.587	-103.893	1500	-62	-8.6	Pecos River At Red Bluff	-4.1	-20.5	50608.6	-58.1	11.08	-53.6667	-7.33333	50	-59.3333	-8.13333
21	211344	hair	bobcat	Lynx	rufus	texensis	male	S	12 Nov 1915	United States	Texas	Frio County	Frio Town	29.023	-99.31	180	-33	-4.5	Nueces River Near Three Rivers	-2.8	-17.4	40404	-90.64	14.54	-27.6667	-3.36667	60	-24	-3.23333
22	188737	hair	bobcat	Lynx	rufus	texensis	male	S	13 Oct 1885	United States	Texas	Mason County	Mason	30.7515	-99.2348	470	-39	-5.5	South Fork Rocky Creek Near Briggs, TX	-3.4	-20.5	86.247	-97.09	15.06	-31.6667	-4	60	-33	-4.46667
23	135084	hair	bobcat	Lynx	rufus	texensis	male	S	1 Dec 1904	United States	Texas	Hardin County	Saratoga	30.3	-94.535	15	-28	-3.9	Neches River At Evadale	-2.9	-16.3	20593.1	-19.34	11.96	-22.3333	-2.6	70	-19.6667	-2.66667
24	188736	hair	bobcat	Lynx	rufus	texensis	female	S	18 May 1886	United States	Texas	Cooke County		33.657	-97.345	240	-41	-5.8	Washita River Near Dickson, OK	-3.5	-21.5	18653.2	-12.9	9.16	-32	-4.13333	60	-35	-4.86667
25	014908	hair	bobcat	Lynx	rufus	texensis	male	S	29 Apr 1877	United States	Texas		Hidalgo	26.122	-98.257	31	-27	-3.7	Rio Grande Near Brownsville	-1.3	-11.6	456702	-58.13	11.02	-26	-3.16667	70	-14	-2.03333
26	4737	hair	bobcat	Lynx	rufus	no details	female	U	Dec. 1946	United States	Utah	Emery	Joe´s Valley	39.305	-111.299	2194	-105	-14.3	Sevier River Near Lynndyl	-13.3	-105.2	15451.9	-102.61	13.67	-82.6667	-10.6	50	-109.667	-14.8667
27	7108	hair	bobcat	Lynx	rufus	no details	female	U	Dec. 1948	United States	Utah	Duchesne	5 Mi S South Myton	40.1995	-110.067	1550	-98	-13.3	White River At Mouth Near Ouray	-16.7	-124.4	13260.8	-65.96	11.7	-76.6667	-9.8	50	-99.6667	-13.5667
28	7106	hair	bobcat	Lynx	rufus	no details	female	U	Dec. 1949	United States	Utah	Duchesne	6 Mi S South Myton	40.1995	-110.067	1550	-98	-13.3	White River At Mouth Near Ouray	-16.7	-124.4	13260.8	-61.1	10.57	-76.6667	-9.8	50	-99.6667	-13.5667
29	1767	hair	bobcat	Lynx	rufus	no details	female	U	Dec. 1960	United States	Utah	Beaver	Wildcat Creek. Tushar Mountains	38.334	-112.726	1767	-97	-13	Beaver Riv At Adamsville	-14.6	-107.5	784.77	-76.79	11.59	-76	-9.53333	50	-100.333	-13.5
30	2290	hair	bobcat	Lynx	rufus	no details	male	U	May 1968	United States	Utah	Carbon	1 Mi n Castle Gate power Plan	39.7374	-110.871	1890	-102	-13.8	Sevier River Near Lynndyl	-13.3	-105.2	15451.9	-67.48	12.49	-80	-10.2	50	-105.333	-14.2333
31	6531	hair	bobcat	Lynx	rufus	no details	male	U	Jan. 1948	United States	Utah	Beaver	W of Minersville Reservoir	38.228	-112.811	1706	-95	-12.9	Beaver Riv At Adamsville	-14.6	-107.5	784.77	-63.18	12.39	-25	-9.43333	50	-99.3333	-13.3667
32	1885	hair	bobcat	Lynx	rufus	no details	male	U	Sept. 1963	United States	Utah	Cache	Blacksmith Fork	41.7081	-111.847	1388	-100	-13.5	Bear River Near Corinne	-14.98	-117.7	18205.1	-34.85		-76.6667	-9.8	50	-100	-13.5333
33	6503	hair	bobcat	Lynx	rufus	no details	male	U	Feb. 1948	United States	Utah	Rich	Crawford Mountains	41.686	-111.064	2255	-113	-15.2	Bear River Near Corinne	-14.98	-117.7	18205.1	-102.24	14.63	-85	-11.0667	50	-114	-15.4333
34	6513	hair	bobcat	Lynx	rufus	no details	female	U	Feb. 1948	United States	Utah	Rich	Beaver River. 6 Mi N Woodruff	41.561	-111.144	1932	-108	-14.5	Bear River Near Corinne	-14.98	-117.7	18205.1	-30.88	11.22	-82.3333	-10.6	50	-109	-14.7333
35	2033	hair	bobcat	Lynx	rufus	no details	male	U	Aug. 1964	United States	Utah	Rich	Swan Creek. 3 1/2 Mi NW Garde	41.989	-111.413	1820	-107	-14.5	Bear River Near Corinne	-14.98	-117.7	18205.1	-69.46	15.17	-81.6667	-10.5667	50	-108	-14.6333
36	6506	hair	bobcat	Lynx	rufus	no details	female	U	Dec. 1947	United States	Utah	Wayne	Boulder pass	38.15	-111.325	2620	-108	-14.6	Colorado River At Lees Ferry, AZ	-15	-114.8	289562	-60.48	9.09	-84	-10.8333	50	-113.667	-15.3333
37	6517	hair	bobcat	Lynx	rufus	no details	male	U	Feb. 1948	United States	Utah	Wayne	Pine Crest. Boulder Mountains	38.155	-111.487	3400	-119	-16.1	Colorado River At Lees Ferry, AZ	-15	-114.8	289562	-94.56	11.3	-92	-12	50	-126.667	-17.0667
38	6519	hair	bobcat	Lynx	rufus	no details	unknown	U	Mar. 1949	United States	Utah	Washington	Near Kolob Peak	37.425	-113.074	2590	-106	-14.2	Virgin River At Littlefield, AZ	-12.3	-92.1	13183.1	-71.78	10.83	-81	-10.2667	50	-110.333	-14.8667
39	4641	hair	bobcat	Lynx	rufus	no details	male	U	Feb. 1946	United States	Utah	Kane	8 Mi SW Orderville	37.275	-112.638	1700	-92	-12.4	Virgin River At Littlefield, AZ	-12.3	-92.1	13183.1	-63.12	11.17	-72	-9	50	-95.6667	-12.9
40	7107	hair	bobcat	Lynx	rufus	no details	male	U	Mar. 1949	United States	Utah	San Juan	Perkin´s Ranch. between Blanding	37.58	-109.432	1670	-91	-12.5	San Juan River Near Bluff	-13.3	-97.3	59570	-70.73	15.63	-72.6667	-9.3	50	-95	-12.9
41	6523	hair	bobcat	Lynx	rufus	no details	male	U	Jan. 1948	United States	Utah	Garfield	Sanford Creek	37.938	-112.371	2070	-100	-13.5	Beaver Riv At Adamsville	-14.6	-107.5	784.77	-107.25	15.93	-78	-9.86667	50	-104	-14.0333
42	6499	hair	bobcat	Lynx	rufus	no details	female	U	Jan. 1948	United States	Utah	Grand	Salt Valley	38.7178	-109.551	1463	-92	-12.5	Dolores River Near Cisco	-13.7	-101	11862.2	-31.7	16.04	-72.3333	-9.26667	50	-93.6667	-12.8
43	6525	hair	bobcat	Lynx	rufus	no details	female	U	Jan. 1948	United States	Utah	Grand	Salt Valley	38.7253	-109.525	1340	-90	-12.3	Dolores River Near Cisco	-13.7	-101	11862.2	-108.39	11.38	-71.3333	-9.06667	50	-92	-12.5333
44	27141	hair	bobcat	Lynx	rufus	no details	male	U	Apr. 1964	United States	Utah	Tooele	Camelback mountain	40.181	-111.569	2500	-112	-15.2	Jordan River At 1700 S At Salt Lake City	-12.8	-103.2	8857.8	-91.29	12.75	-86.6667	-11.1667	50	-116.667	-15.7
45	132475	hair	bobcat	Lynx	rufus	baileyi	male	S	5 Apr 1904	United States	New Mexico		Cienequilla	35.5955	-106.125	1930	-85	-11.9	Canadian River Near Sanchez	-10.2	-76.3	15578.9		12.06	-71	-9.66667	50	-90.6667	-12.6333
46	146260	hair	puma	Puma	concolor	couguar	unknown	S	9 Nov 1905	United States	California		Upper Mattole	40.254	-124.133	98	-80	-10.4	Eel River At Scotia	-7.4	-50.4	8062.67	-29.02	12.14	-65	-7.26667	70	-77	-9.9
47	274594	hair	puma	Puma	concolor	couguar	male	S	12 Dec 1944	United States	Colorado		Meeker	40.0508	-107.91	1900	-101	-13.6	Yampa River Near Maybell	-16.4	-123.9	8831.9	-86.76	9.45	-77.6667	-10.0333	60	-102.667	-13.9333
48	265596	hair	puma	Puma	concolor	couguar	unknown	S	1 Apr 1940	United States	Florida	Collier County	Indian Camp. 3 Mi Of Immokalee	26.417	-81.42	11	-21	-3.6	Fisheating Creek At Palmdale	-0.1	0.6	805.49	-87.04	3.31	-23	-3.6	70	-14.3333	-2.8
49	210433	hair	puma	Puma	concolor	couguar	female	S	12 Dec 1915	United States	Idaho		Clearwater River. Middle Fork	46.1347	-115.787	400	-97	-12.8	Salmon River At Whitebird	-17.5	-132.7	35094.5	-85.31	7.89	-75.3333	-9.4	60	-89.6667	-12.0333
50	228587	hair	puma	Puma	concolor	couguar	female	S	3 Apr 1918	United States	New Mexico		Alma. 15 Mi N	33.3731	-108.903	1500	-76	-10.4	Animas River At Farmington	-14.1	-102.8	3522.4	-71.74	5.74	-64	-8.36667	45	-80	-10.9333
51	274078	hair	puma	Puma	concolor	couguar	female	S	17 Oct 1943	United States	New Mexico		Hot Springs. 35 Mi W. Todder Ranch	35.648	-105.294	2070	-86	-12	Canadian River Near Sanchez	-10.2	-76.3	15578.9	-89.66	13.88	-73.6667	-10	50	-93.6667	-12.9667
52	235091	hair	puma	Puma	concolor	couguar	female	S	16 May 1920	United States	New Mexico		San Mateo Mountains. 35 Mi NE	35.1897	-107.666	2438	-88	-12.2	Rio Grande Conveyance Channel At San Marcial	-9.6	-93.9	0	-81.94	10.47	-76	-10.2333	50	-99.6667	-13.7333
53	261685	hair	puma	Puma	concolor	couguar	male	S	23 Mar 1936	United States	Texas	Brewster County	Nine Points Mountain Range	29.6662	-103.362	1160	-54	-7.5	Pecos River At Red Bluff	-4.1	-36.7	50608.6	-60.01	7.86	-46.6667	-6.36667	50	-49	-6.76667
54	273040	hair	puma	Puma	concolor	couguar	male	S	2 Jul 1942	United States	Texas	Webb County	Aguilares. 20 Mi S	26.971	-99.252	180	-31	-4.2	Rio Grande Near Brownsville	-1.3	-11.6	456702	-56.36	4.43	-27.6667	-3.4	70	-19.6667	-2.63333
55	272334	hair	puma	Puma	concolor	stanleyana	male	S	April 1942	United States	Texas		Sierra Blanca. 22 Mi S. Quitman Mountains. Ed Loves Ranch	31.15	-105.497	1600	-67	-9.3	Rio Grande At Fort Quitman	-8.5	-71.1	82735	-95.5	8.88	-58	-7.9	40	-65.3333	-9
56	228468	hair	puma	Puma	concolor	couguar	male	S	24 Feb 1918	United States	Texas		Sheffield	32.9373	-94.2538	80	-34	-5	Red River At Index, AR	-3.7	-22.8	124398	-33.22	10.41	-25	-3.2	70	-26.6667	-3.83333
57	261748	hair	puma	Puma	concolor	couguar	male	S	16 May 1936	United States	Texas		Pearsall. 26 Mi S	28.8888	-99.0968	193	-33	-4.5	Nueces River Near Three Rivers	-2.8	-17.4	40404	-32.39	16.14	-27.3333	-3.33333	60	-24	-3.16667
58	250184	hair	puma	Puma	concolor	couguar	male	S	21 Jan 1932	United States	Washington	Clallam County	Elwha River	48.0778	-123.577	600	-94	-12.2	Elwha River At McDonald Br Near Prt Angeles	-12.6	-89.7	696.71	-62.21	16.84	-81.3333	-9.8	85	-92.3333	-11.9667
59	6559	hair	puma	Puma	concolor	couguar	female	U	Mar. 1948	United States	Utah	Garfield	NE of Panguitch	37.8273	-112.435	2019	-99	-13.3	Beaver Riv At Adamsville	-14.6	-107.5	784.77	-29.96	6.37	-77.3333	-9.76667	50	-102.667	-13.8667
60	6539	hair	puma	Puma	concolor	couguar	unknown	U	1948-01-01	United States	Utah	Iron	Cedar City	37.6836	-113.086	1782	-95	-12.8	Virgin River At Littlefield, AZ	-12.3	-92.1	13183.1	-55.06	6.99	-74	-9.23333	50	-98.6667	-13.2333
61	6556	hair	puma	Puma	concolor	couguar	female	U	1948-02-01	United States	Utah	Garfield	Lost creek. S of Circleville	38.0193	-112.237	2200	-102	-13.8	Beaver Riv At Adamsville	-14.6	-107.5	784.77	-55.68	11.11	-79.6667	-10.1	50	-70.6667	-9.6
62	6561	hair	puma	Puma	concolor	couguar	female	U	1948-02-01	United States	Utah	Beaver	Fish Creek. 10 Mi SE Cove For	38.4156	-112.43	2800	-112	-15.1	Beaver Riv At Adamsville	-14.6	-107.5	784.77	-52.89	14.68	-86.6667	-11.1333	50	-117.667	-15.8667
63	6533	hair	puma	Puma	concolor	couguar	female	U	1948-02-01	United States	Utah	Garfield	Sandy	37.9119	-112.457	2070	-100	-13.5	Beaver Riv At Adamsville	-14.6	-107.5	784.77	-81.91	12.92	-77.6667	-9.86667	50	-104	-14.0333
64	6542	hair	puma	Puma	concolor	couguar	male	U	1948-02-01	United States	Utah	Uintah	White River	39.957	-109.263	1600	-98	-13.2	White River At Mouth Near Ouray	-16.7	-124.4	13260.8	-44.02	9.36	-75.3333	-9.73333	55	-99	-13.4667
65	6555	hair	puma	Puma	concolor	couguar	male	U	1948-02-01	United States	Utah	Box Elder	Park Valley	41.8175	-113.31	1706	-106	-14.2	Bear River Near Corinne	-14.98	-117.7	18205.1	-13.62	15.29	-81.6667	-10.3667	50	-106	-14.3333
66	4717	hair	puma	Puma	concolor	couguar	male	U	1943-01-01	United States	Utah	Duchesne	Wild Strawberry Canyon. Near J	40.1331	-111.018	2400	-110	-15	Jordan River At 1700 S At Salt Lake City	-12.8	-103.2	8857.8	-52.77	10.4	-85.6667	-11.0333	50	-114.333	-15.4667
67	6543	hair	puma	Puma	concolor	couguar	female	U	1948-02-01	United States	Utah	Box Elder	Park Valley	41.8175	-113.31	1706	-106	-14.2	Bear River Near Corinne	-14.98	-117.7	18205.1	-71.64	2.66	-81.6667	-10.3667	50	-106	-14.3333
68	6544	hair	puma	Puma	concolor	couguar	unknown	U	1948-02-01	United States	Utah	Iron	Cedar City	37.6751	-113.104	1800	-95	-12.8	Virgin River At Littlefield, AZ	-12.3	-92.1	13183.1	-82.17	7.9	-74	-9.23333	50	-98.6667	-13.2667
69	7136	hair	puma	Puma	concolor	couguar	female	U	1950-01-01	United States	Utah	Iron	Fiddlers Canyon	37.7141	-113.031	1900	-97	-13	Virgin River At Littlefield, AZ	-12.3	-92.1	13183.1	-73.83	15.38	-75	-9.43333	50	-100	-13.5
70	6545	hair	puma	Puma	concolor	couguar	female	U	Dec. 1947	United States	Utah	Millard	Fish Creek	38.5666	-112.431	1950	-100	-13.5	Beaver Riv At Adamsville	-14.6	-107.5	784.77	-66.96	20.16	-78.6667	-9.93333	50	-104.333	-14.0667
71	4738	hair	puma	Puma	concolor	couguar	female	U	1947-01-01	United States	Utah	Millard	Chalk Creek Canyon	38.9445	-112.251	1800	-99	-13.4	Sevier River Near Lynndyl	-13.3	-105.2	15451.9	-77.5	20.9	-78	-9.93333	50	-102.667	-13.9
72	6551	hair	puma	Puma	concolor	couguar	female	U	1948-02-01	United States	Utah	Piute	W of Circleville	38.1808	-112.306	1900	-98	-13.2	Beaver Riv At Adamsville	-14.6	-107.5	784.77	-66.85	10.51	-77.3333	-9.76667	50	-102.667	-13.8
73	14970	hair	puma	Puma	concolor	couguar	unknown	S	1957-04-01	United States	Utah	Millard	Near Fillmore	38.9728	-112.344	1560	-96	-12.9	Sevier River Near Lynndyl	-13.3	-105.2	15451.9	-78.36	17.51	-76	-9.6	50	-99	-13.4
74	6537	hair	puma	Puma	concolor	couguar	female	U	1948-02-01	United States	Utah	Piute	Wade Canyon. W of Circleville	38.187	-112.331	2133	-101	-13.7	Beaver Riv At Adamsville	-14.6	-107.5	784.77	-108.98	15.23	-79.6667	-10.1	50	-106	-14.3333
75	6546	hair	puma	Puma	concolor	couguar	male	U	1948-02-01	United States	Utah	Sevier	Monroe	38.6294	-112.123	1640	-96	-12.9	Beaver Riv At Adamsville	-14.6	-107.5	784.77	-101.61	12.25	-76	-9.56667	50	-99.3333	-13.4333
76	104561	hair	Eastern cottontail rabbit	Sylvilagus	floridanus	mearnsii	unknown	S	30 Oct 1900	United States	Texas		Atlanta	33.1251	-94.1592	79	-35	-5.1	Red River At Index, AR	-3.7	-22.8	124398	-54.47	14.21
77	249782	hair	Eastern cottontail rabbit	Sylvilagus	floridanus	mearnsii	f	S	unknown	United States	Minnesota		Cass Lake	47.3786	-94.6039	406	-82	-11.2	Nemadji River Near South Superior	-10.5	-73.8	1087.8	-101.63	12.08
78	213352	hair	Eastern cottontail rabbit	Sylvilagus	floridanus	mearnsii	f	S	unknown	United States	Montana		Boxelder Creek, 25 Mi SW Sykes	48.246	-109.865	1097	-112	-14.9	St Mary River At International Boundary	-16.7	-127.1	1214.71	-136.66	10.4593
79	11349	hair	Eastern cottontail rabbit	Sylvilagus	floridanus	mearnsii	unknown	S	unknown	United States	South Dakota		Fort Randall	43.0244	-98.6242	490	-71	-9.9	Niobrara River Near Verdel	-10.13	-75.1	32634	-81.41	17.3929
80	486790	hair	Eastern cottontail rabbit	Sylvilagus	floridanus	mearnsii	f	S	9 Mar 1973	United States	Texas	Irion County	Big Lake, 23 Mi NW	31.1933	-101.461	892	-49	-6.9	Pecos River At Red Bluff	-4.1	-20.5	50608.6	-45.74	15.6716
81	24573	hair	Eastern cottontail rabbit	Sylvilagus	floridanus	mearnsii	f	S	22 Nov 1890	United States	Texas	Dimmit County	Blocker Ranch, San Lorenzo Creek	28.341	-99.98	184	-33	-4.6	Devils River At Pafford Crossing Near Comstock	-4.5	-27.8	10259	-15.98	19.9119
82	108611	hair	Eastern cottontail rabbit	Sylvilagus	floridanus	mearnsii	f	S	9 May 1901	United States	Texas		Comstock	29.6844	-101.173	490	-41	-5.8	Devils River At Pafford Crossing Near Comstock	-4.5	-27.8	10259	-44.76	18.6337
83	31665	hair	Eastern cottontail rabbit	Sylvilagus	floridanus	mearnsii	m	S	23 Oct 1891	United States	Texas		Corpus Christi	27.7428	-97.4019	2	-27	-3.6	Nueces River Near Three Rivers	-2.8	-17.4	40404	-30.55	18.8536
84	189168	hair	Eastern cottontail rabbit	Sylvilagus	floridanus	mearnsii	f	S	24 Feb 1886	United States	Texas		Gainesville	33.6242	-97.1453	230	-40	-5.7	Washita River Near Dickson, OK	-3.5	-21.5	18653.2	-52.08	17.6413
85	189173	hair	Eastern cottontail rabbit	Sylvilagus	floridanus	mearnsii	m	S	28 Nov 1885	United States	Texas	Mason County	Mason	30.7478	-99.2319	470	-39	-5.5	South Fork Rocky Creek Near Briggs, TX	-3.4	-20.5	86.247	-52.01	18.2513
86	029023	hair	Eastern cottontail rabbit	Sylvilagus	floridanus	mearnsii	m	S	4 Jun 1891	United States	Texas		Rio Grande City	26.3806	-98.8183	53	-28	-3.8	Rio Grande Near Brownsville	-1.3	-11.6	456702	-23.92	18.6244
87	136554	hair	Eastern cottontail rabbit	Sylvilagus	floridanus	mearnsii	f	S	26 Mar 1905	United States	Texas		Sour Lake, 13 Mi NE	30.1369	-94.4075	15	-28	-3.9	Neches River At Evadale	-2.9	-16.3	20593.1	-54.12	14.4345
88	157806	hair	Eastern cottontail rabbit	Sylvilagus	floridanus	mearnsii	m	S	17 Sep 1908	United States	New Mexico		Burro Mountains	32.5906	-108.433	1700	-77	-10.5	Animas River At Farmington	-14.1	-102.8	3522.4	-87.74	18.498
89	TX-2,3,5	H collagen, d18O bone phosphate	White-tailed deer	Odocoileus	virginianus		unknown	Cormie et al. 1994		United States	Texas		Corpus Christi	27.826	-97.406	2	-20	-3.3	Nueces River Near Three Rivers	-2.8	-17.4	40404	13	21.5	Deer meteoric water values:
90	FL 1	H collagen, d18O bone phosphate	White-tailed deer	Odocoileus	virginianus		unknown	Cormie et al. 1995		United States	Florida		Tallahassee	30479	-84299	47	-20	-3.3	Sopchoppy River Near Sopchoppy	-3.1	-15.7	264	2	19	dD values from Cormie et al. 1994
91	LA 2	H collagen, d18O bone phosphate	White-tailed deer	Odocoileus	virginianus		unknown	Cormie et al. 1996		United States	Louisiana		Shreveport	32511	-93753	55	-23	-5.2	Red River At Index, AR	-3.7	-22.8	124398	-3	19.1
92	OK 1,2	H collagen, d18O bone phosphate	White-tailed deer	Odocoileus	virginianus		unknown	Cormie et al. 1997		United States	Oklahoma		Tulsa	36183	-95961	206	-29	-4.4	Cimarron River At Perkins	-4.13	-27.3	46236.5	8	19.7
93	TX 1	H collagen, d18O bone phosphate	White-tailed deer	Odocoileus	virginianus		unknown	Cormie et al. 1998		United States	Texas		San Angelo	31429	-100399	585	-29	-4.4	Pecos River At Red Bluff	-4.1	-20.5	50608.6	-6	22.8
94	MO 4	H collagen, d18O bone phosphate	White-tailed deer	Odocoileus	virginianus		unknown	Cormie et al. 1999		United States	Missouri		Springfield	37246	-93389	386	-30	-5.8	Osage River Near Schell City	-4.9	-31.2	14322.6	-10	18.4
95	OK 10	H collagen, d18O bone phosphate	White-tailed deer	Odocoileus	virginianus		unknown	Cormie et al. 2000		United States	Oklahoma		Tulsa	36183	-95961	206	-36	-5.2	Cimarron River At Perkins	-4.13	-27.3	46236.5	-1	19.6
96	WV 1,3	H collagen, d18O bone phosphate	White-tailed deer	Odocoileus	virginianus		unknown	Cormie et al. 2001		United States	West Virginia		Huntington	38413	-82434	252	-36	-7.3	Little Kanawha River At Palestine, WV	-7.3	-47.6	3923.85	-14	16.5
97	OK 5	H collagen, d18O bone phosphate	White-tailed deer	Odocoileus	virginianus		unknown	Cormie et al. 2002		United States	Oklahoma		Tulsa	36183	-95961	206	-37	-6.4	Cimarron River At Perkins	-4.13	-27.3	46236.5	-1	19.3
98	KS 1	H collagen, d18O bone phosphate	White-tailed deer	Odocoileus	virginianus		unknown	Cormie et al. 2003		United States	Kansas		Topeka	39056	-95689	269	-38	-7.1	Missouri River At St. Joseph	-11	-85.5	1088572	-11	18.7
99	OH 3,1	H collagen, d18O bone phosphate	White-tailed deer	Odocoileus	virginianus		unknown	Cormie et al. 2004		United States	Ohio		Columbus	39998	-82892	248	-40	-6.4	Little Kanawha River At Palestine, WV	-7.3	-47.6	3923.85	-7	18.3
100	NS 1	H collagen, d18O bone phosphate	White-tailed deer	Odocoileus	virginianus		unknown	Cormie et al. 2005		Canada	Nova Scotia		Yarmouth	43827	-66088	43	-49	-7.7	St. John River At Van Buren	-11.7	-82.4	21170.6	-34	15.9
101	NS 2	H collagen, d18O bone phosphate	White-tailed deer	Odocoileus	virginianus		unknown	Cormie et al. 2006		Canada	Nova Scotia		Sydney	46135	-60183	62	-53	-8.1	St. John River At Van Buren	-11.7	-82.4	21170.6	-31	15.9
102	WI 1	H collagen, d18O bone phosphate	White-tailed deer	Odocoileus	virginianus		unknown	Cormie et al. 2007		United States	Wisconsin		Green Bay	44513	-88016	212	-53	-10.2	Menominee River Near McAllister	-10.64	-75.3	10178.6	-39	14.7
103	ON 1	H collagen, d18O bone phosphate	White-tailed deer	Odocoileus	virginianus		unknown	Cormie et al. 2008		Canada	Ontario		Trenton	44.1	-77581	86	-55	-9.9	Genesee River (Charlotte Docks) At Rochester	-8.6	-60.3	6363.6	-31	15
104	NB 1	H collagen, d18O bone phosphate	White-tailed deer	Odocoileus	virginianus		unknown	Cormie et al. 2009		Canada	New Brunswick		Fredericton	45954	-66646	21	-55	-8.7	St. John River At Van Buren	-11.7	-82.4	21170.6	-37	14.5
105	AZ 1	H collagen, d18O bone phosphate	White-tailed deer	Odocoileus	virginianus		unknown	Cormie et al. 2010		United States	Arizona		Phoenix	33448	-112073	335	-58	-8.2	Salt River Below Stewart Mountain Dam	-8.8	-65.4	16140.8	-3	23
106	ON3	H collagen, d18O bone phosphate	White-tailed deer	Odocoileus	virginianus		unknown	Cormie et al. 2011		Canada	Ontario		Peterborough	44288	-78330	200	-58	-9.3	Genesee River (Charlotte Docks) At Rochester	-8.6	-60.3	6363.6	-43	13.9
107	ON 6	H collagen, d18O bone phosphate	White-tailed deer	Odocoileus	virginianus		unknown	Cormie et al. 2012		Canada	Ontario		Sudbury	46491	-80998	300	-61	-9.8	St Marys River Above Sault Ste Marie	-8.8	-67.4	209530	-43	13.6
108	QC 1	H collagen, d18O bone phosphate	White-tailed deer	Odocoileus	virginianus		unknown	Cormie et al. 2013		Canada	Québec		Montréal-Mirabel	45682	-74005	82	-66	-12	Oswegatchie River Near Heuvelton	-9.9	-96.1	2499.35	-54	13.9
109	NE 2	H collagen, d18O bone phosphate	White-tailed deer	Odocoileus	virginianus		unknown	Cormie et al. 2014		United States	Nebraska		Scottsbluff	41866	-103665	1200	-70	-12	North Platte River At Lisco	-13.8	-110.8	69152.7	-28	16.3
110	BC 4	H collagen, d18O bone phosphate	White-tailed deer	Odocoileus	virginianus		unknown	Cormie et al. 2015		Canada	British Columbia		Sandspit	53243	-131821	200	-77	-10.6					-50	13.9
111	OR 1	H collagen, d18O bone phosphate	White-tailed deer	Odocoileus	virginianus		unknown	Cormie et al. 2016		United States	Oregon		Winnemucca	40969	-117731	400	-87	-14	Sagehen Creek Near Truckee	-14.4	-104.8	27.19	-49	17
112	WY 2	H collagen, d18O bone phosphate	White-tailed deer	Odocoileus	virginianus		unknown	Cormie et al. 2017		United States	Wyoming		Sheridan	44769	-106980	1225	-91	-14.9	Wind River Below Boysen Reservoir	-127.38	-16.34	19945.5	-59	13.6
113	MT1	H collagen, d18O bone phosphate	White-tailed deer	Odocoileus	virginianus		unknown	Cormie et al. 2018		United States	Montana		Glasgow	48212	-106615	700	-96	-15.5	Milk River At Nashua	-14.55	-121.7	57839.6	-54	14.3
114	AB 6	H collagen, d18O bone phosphate	White-tailed deer	Odocoileus	virginianus		unknown	Cormie et al. 2019		Canada	Alberta		Medicine Hat	50042	-110674	717	-107	-17.4					-81	13.3
115	SA 1	H collagen, d18O bone phosphate	White-tailed deer	Odocoileus	virginianus		unknown	Cormie et al. 2020		Canada	Saskatchewan		Saskatoon	52171	-106.7	500	-110	-16.6					-51	14
116	AB 4,5	H collagen, d18O bone phosphate	White-tailed deer	Odocoileus	virginianus		unknown	Cormie et al. 2021		Canada	Alberta		Lethbridge	49631	-112800	929	-112	-18					-71	10.9
117	AB 1,2	H collagen, d18O bone phosphate	White-tailed deer	Odocoileus	virginianus		unknown	Cormie et al. 2022		Canada	Alberta		Edmonton	53541	-113494	671	-112	-18					-81	10.6
118	AB 7	H collagen, d18O bone phosphate	White-tailed deer	Odocoileus	virginianus		unknown	Cormie et al. 2023		Canada	Alberta		Calgary	51114	-114020	1084	-116	-18.4					-73	11.3
119	BC 2	H collagen, d18O bone phosphate	White-tailed deer	Odocoileus	virginianus		unknown	Cormie et al. 2024		Canada	British Columbia		Kamloops	50702	-120444	345	-120	-17.7					-93	10.8
